# Supplementary material
Source: PubMed Central journal article supplement (PMC4234148)
Supplement: NIHMS629803-supplement-1.pdf [file NIHMS629803-supplement-1.pdf]

**Supporting on-line material for:**

**Lasting antibody responses are mediated by a combination of newly formed and long-lived  
bone marrow plasma cells drawn from clonally distinct precursors <sup>1</sup>**

Irene Chernova<sup>\*</sup>, Derek D. Jones<sup>\*</sup>, Joel R. Wilmore<sup>\*</sup>, Alexandra Bortnick<sup>\*</sup>, Mesut Yucel<sup>†</sup>, Uri  
Hershberg<sup>††</sup>, David Allman<sup>\*</sup>

From <sup>\*</sup>The Department of Pathology and Laboratory Medicine, University of Pennsylvania School of  
Medicine, Philadelphia, PA 19104, The Department of Bioengineering, Ege University, 35100, Turkey,  
and <sup>††</sup>The School of Biomedical Engineering Science & Health Systems, Drexel University,  
Philadelphia, PA 19104

Address correspondence to: David Allman, University of Pennsylvania, 36<sup>th</sup> & Hamilton Walk, 230  
John Morgan Building, Philadelphia, PA 19104-6082, E-mail: [dallman@mail.med.upenn.edu](mailto:dallman@mail.med.upenn.edu)

This PDF file contains 1 supplemental Figure and 1 supplemental Table.

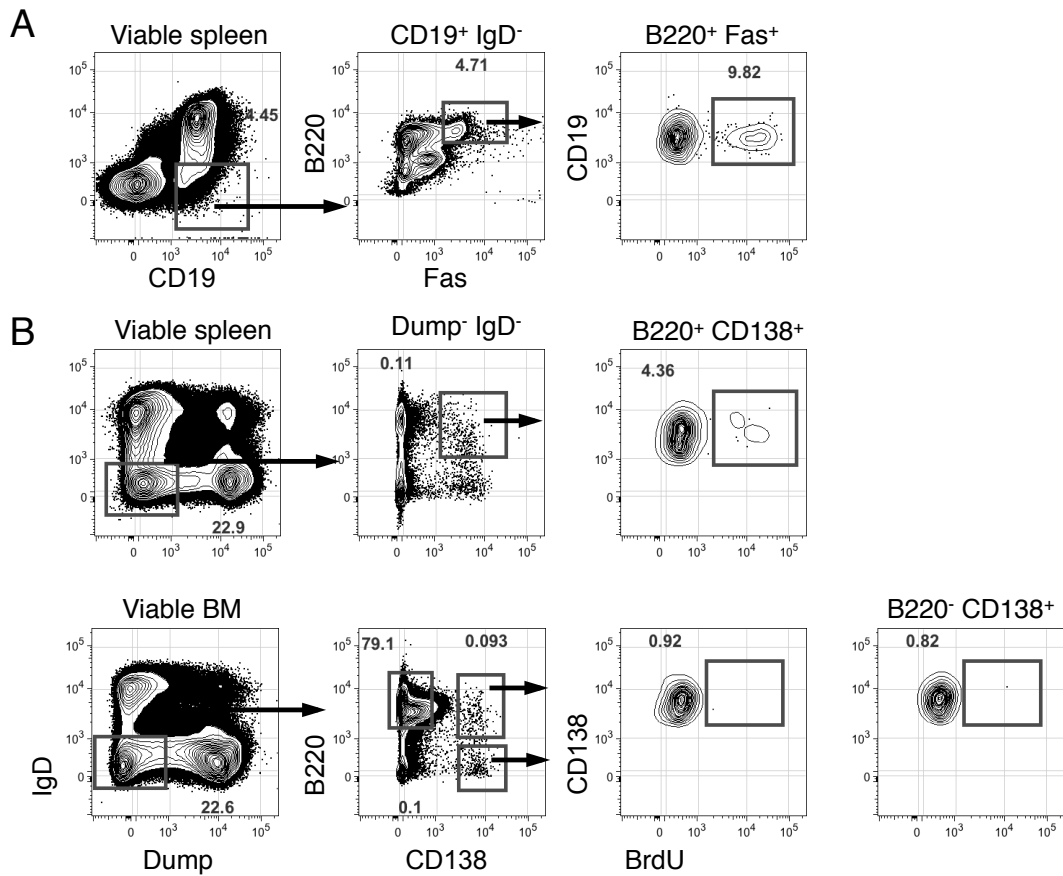

**Supplementary Figure 1. Gating strategy for identifying proliferative (BrdU-pulse) cells.** Spleen or BM cells from B6 mice given a single i.p. inoculation of BrdU 60 minutes previously were prepared and stained with the indicated reagents. Shown are gating strategies for GC B cells (**A**) or PC subsets (**B**) in the spleen (top) or BM (bottom). Representative of three separate experiments.

**Supplementary Table 1:**

**Estimated proliferation and death rates for B220+ BM PCs**

|                             | <b>Method 1</b>                             | <b>Method 2</b>                             | <b>Method 3</b>                             |
|-----------------------------|---------------------------------------------|---------------------------------------------|---------------------------------------------|
| <b><i>p</i></b>             | 0.1654 day <sup>-1</sup><br>(0.1645-0.1663) | 0.1702 day <sup>-1</sup><br>(0.1662-0.1742) | 0.1701 day <sup>-1</sup><br>(0.1691-0.1712) |
| <b><i>d</i></b>             | 0.0750 day <sup>-1</sup><br>(0.0664-0.0836) | 0.1702 day <sup>-1</sup><br>(0.1662-0.1742) | 0.16 day <sup>-1</sup><br>-                 |
| <b><i>Doubling time</i></b> | 4.1907 days                                 | 4.0725 days                                 | 4.0749 days                                 |

*Calculations made based on increasing part of the BrdU abeling curve in Figure 2D.*

*Similar results were obtained when focusing on the decreasing part of the curve. RSS values were <0.02 for all three methods.*
